# Supplementary material for: Optimized paired‐sgRNA/Cas9 cloning and expression cassette triggers high‐efficiency multiplex genome editing in kiwifruit
Source: PubMed Central journal article supplement (PMC6041439; doi:10.1111/pbi.12884), 2018-02-06
Supplement: PBI-16-1424-s001.pdf [file PBI-16-1424-s001.pdf]

Table S1. Primers used for vectors construction, mutation detection, off-target analysis and qPCR.

| Primer name    | Sequence (5'-3')                                           |
|----------------|------------------------------------------------------------|
| F1             | GTGTGGTGTGTCTGCTCTATGTTT                                   |
| R1             | CCAGCGCCCAATCATTTACCCTC                                    |
| F2             | AGTTGTTTGAATACTATGACCAGGATCTCCC                            |
| R2             | GCAGCATATACGCGGAAAGAATTATAAACGAT                           |
| crispr-gRNA1-F | GGTCTCTgattCAGGTCTGTCCCATCAAGATGTTTTAGAGCTAGAAATAG         |
| crispr-gRNA2-R | GGTCTCTAAACCTAAGCCAGTATCAGACTCCAATCACTACTTCGTCTCTA         |
| crispr-gRNA3-F | GGTCTCTgattACTCGATGGATGATGATATAGTTTTAGAGCTAGAAATAG         |
| crispr-gRNA4-R | GGTCTCTAAACGTCTTTAACAGTTAAACCATAATCACTACTTCGTCTCTA         |
| ptg-gRNA1-F    | GGTCTCTTGCACAGGTCTGTCCCATCAAGATGTTTCAGAGCTATGCTGGA         |
| ptg-gRNA2-R    | GGTCTCTAAACCTAAGCCAGTATCAGACTCCTGCACCAGCCGGGAATCGA         |
| ptg-gRNA3-F    | GGTCTCTTGCAACTCGATGGATGATGATATAGTTTCAGAGCTATGCTGGA         |
| ptg-gRNA4-R    | GGTCTCTAAACGTCTTTAACAGTTAAACCATTGCACCAGCCGGGAATCGA         |
| SP-DL          | GTCGTGCTCCACATGTTGACCGG                                    |
| SP-R           | CCCGACATAGATGCAATAACTTC                                    |
| GF             | aGAGACCGGTCTCGGTTTCAGAGCTATGCTGGAAACAGC                    |
| GR             | AGCTCGAGAGGCGCGAAAAAGCACCGACTCGGTGCCACTTTTTCAAGTTGAT       |
| U6-1-F         | GACCGGTAAGGCGCGAGAAATCTCAAATTCGCGCAGAACAA                  |
| U6-1-C         | CGAGACCGGTCTcAATCACTACTTCGTCTCTAACCATATAT                  |
| U6-1-R         | CACTGGTGCTTTGTTAATCACTACTTCGTCTCTAACCATATAT                |
| TF             | AACAAAGCACCAGTGGTCTAGTGGTAGAATAGTACCCTGCCACGGTACAGACCCGGGT |
| TR             | CGAGACCGGTCTcTGCACCAGCCGGGAATCGAACCCGGGTCTGTACCGTGG        |
| gRNA-R         | GCACCGACTCGGTGCCAC                                         |
| gRNA1-F        | CAGGTCTGTCCCATCAAGATGTTTCAGAGC                             |
| gRNA2-F        | GGAGTCTGATACTGGCTTAGGTTTCAGAGC                             |
| gRNA3-F        | ACTCGATGGATGATGATATAGTTTCAGAGC                             |
| gRNA4-F        | ATGGTTTAACTGTAAAGACGTTTCAGAGC                              |
| Achn107181-F   | TGAGAGATTCCGTTGCCCAGAAGT                                   |
| Achn107181-R   | TTCCTTACTCATGCGGTCTGCGAT                                   |
| PP2A-F         | GCAGCACATAATTCCACAGG                                       |
| PP2A-R         | TTTCTGAGCCCATAACAGGAG                                      |
| T1-F           | GTGTGGTGTGTCTGCTCTATGTTT                                   |
| T1-R           | CTCTCTCACATTGGTGGGGTTGT                                    |
| T2-F           | ACAACCCACCAATGTGAGAGAG                                     |
| T2-R           | CCAGCGCCCAATCATTTACCCTC                                    |
| T3-F           | AGTTGTTTGAATACTATGACCAGGATCTCCC                            |
| T3-R           | CATATGGCTGTCCACCTAGCATTGC                                  |
| T4-F           | AGCAATGCTAGGTGGACAGCCATATG                                 |
| T4-R           | GCAGCATATACGCGGAAAGAATTATAAACGAT                           |
| OT1-F          | TCTCCACCTTCTTTATGC                                         |
| OT1-R          | TGCTATTTGTCCGTCTC                                          |
| OT2-F          | ATAACCAAGGCAGAGC                                           |
| OT2-R          | AACCCATGACCACTAAC                                          |
| OT3-F          | TGGCAATGAACACCTC                                           |
| OT3-R          | AACCCATGACCACTAACT                                         |
| OT4-F          | TCACCAGGTTCAAAGC                                           |
| OT4-R          | GTTAGCGTCCCTCACA                                           |

Table S2. Summary of mutagenesis frequencies in positive clones selected.

| Vector ID | sgRNA         | No. of clones analyzed | No. of mutated clones | Mutation frequency (%) |
|-----------|---------------|------------------------|-----------------------|------------------------|
| A1        | sgRNA1        | 120                    | 9                     | 7.50%                  |
|           | sgRNA2        |                        | 9                     | 7.50%                  |
|           | sgRNA1&sgRNA2 |                        | 9                     | 7.50%                  |
| A2        | sgRNA3        | 280                    | 0                     | 0.00%                  |
|           | sgRNA4        |                        | 19                    | 6.78%                  |
|           | sgRNA3&sgRNA4 |                        | 0                     | 0.00%                  |
| B1        | sgRNA1        | 120                    | 109                   | 90.83%                 |
|           | sgRNA2        |                        | 98                    | 81.67%                 |
|           | sgRNA1&sgRNA2 |                        | 98                    | 81.67%                 |
| B2        | sgRNA3        | 260                    | 190                   | 73.07%                 |
|           | sgRNA4        |                        | 158                   | 65.38%                 |
|           | sgRNA3&sgRNA4 |                        | 156                   | 60.00%                 |

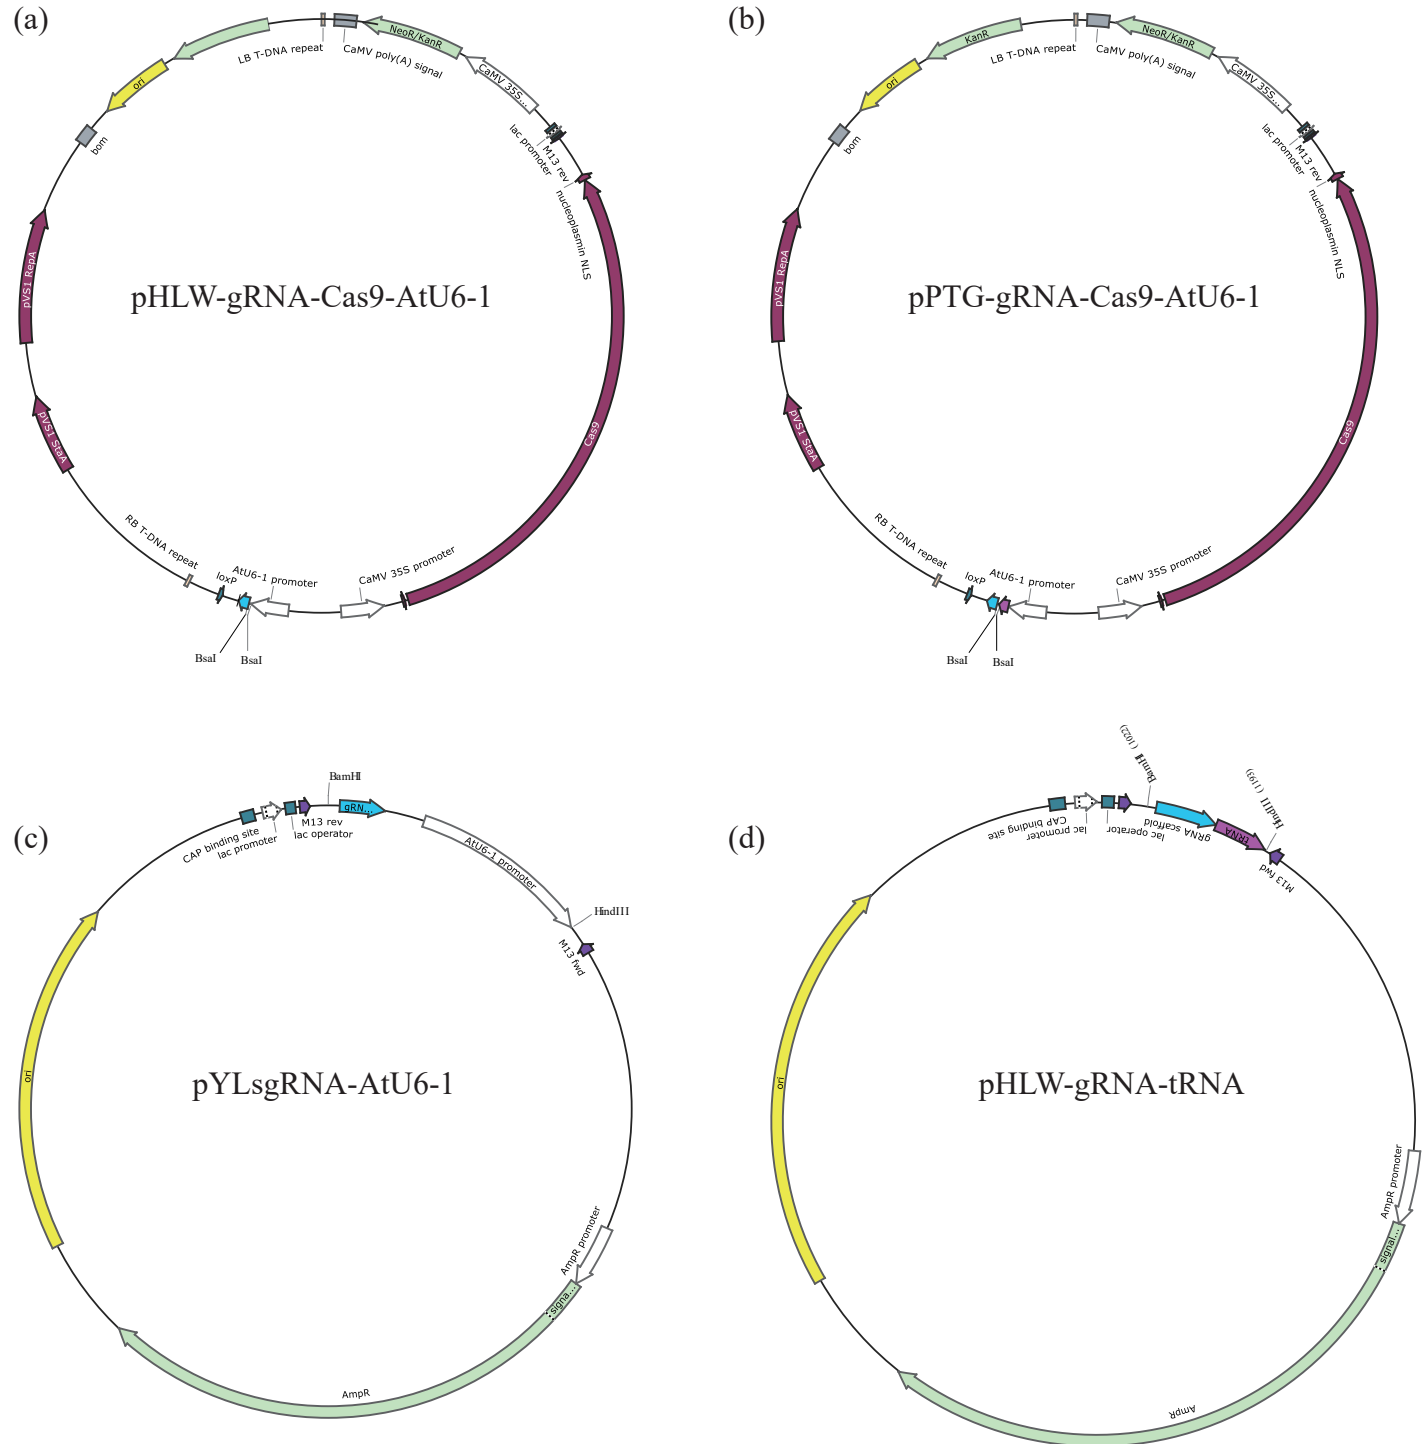

Figure S1. Overall structure of vectors for CRISPR/Cas system. (a) Overall structure of the Cas9 binary expression vector for CRISPR/Cas9 system. (b) Overall structure of the Cas9 binary expression vector for PTG/Cas9 system. (c) Overall structure of the sgRNA intermediate vector for CRISPR/Cas9 system. (d) Overall structure of the sgRNA intermediate vector for PTG/Cas9 system.

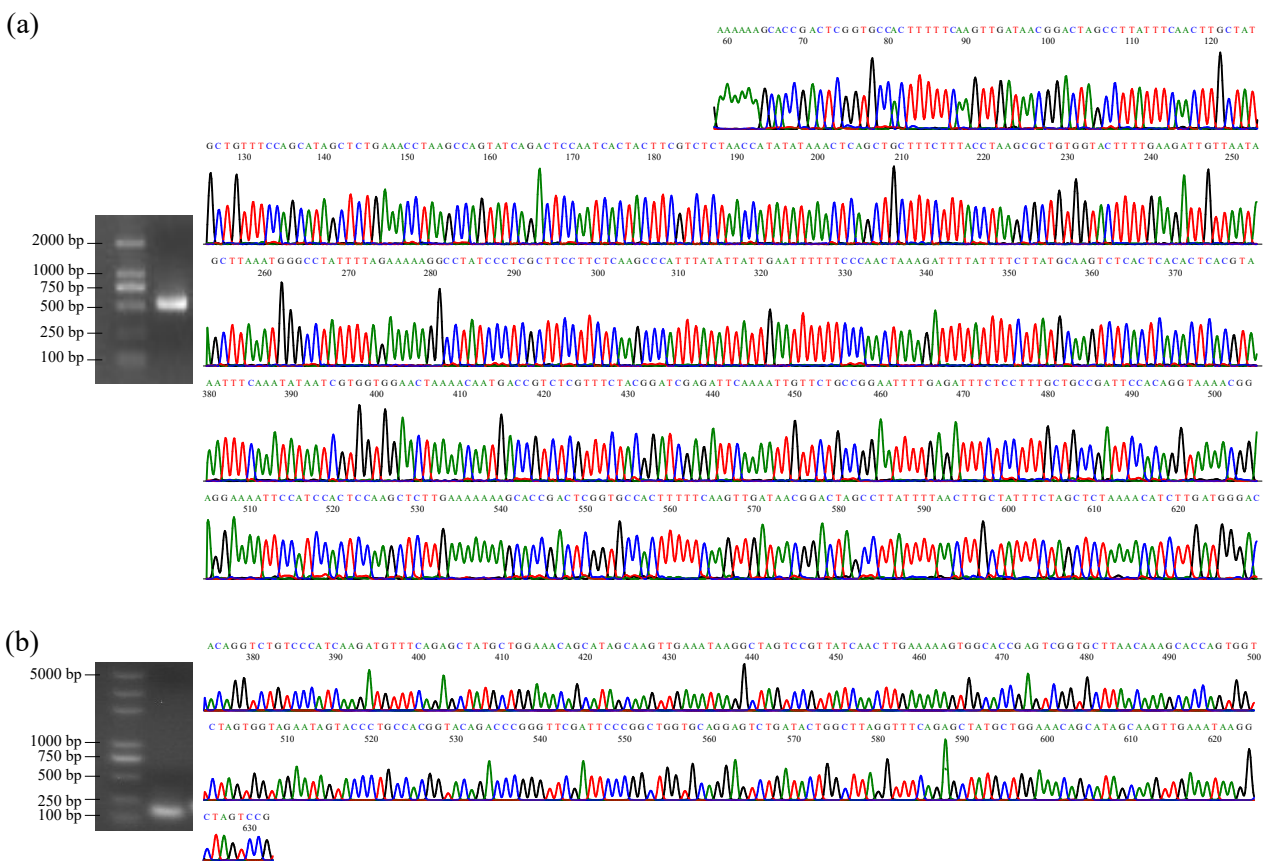

Figure S2. PCR validation and Sanger sequencing of PCR products amplified from paired-sgRNAs/Cas9 vectors. (a) Validation for CRISPR/Cas9 system. (b) Validation for PTG/Cas9 system.

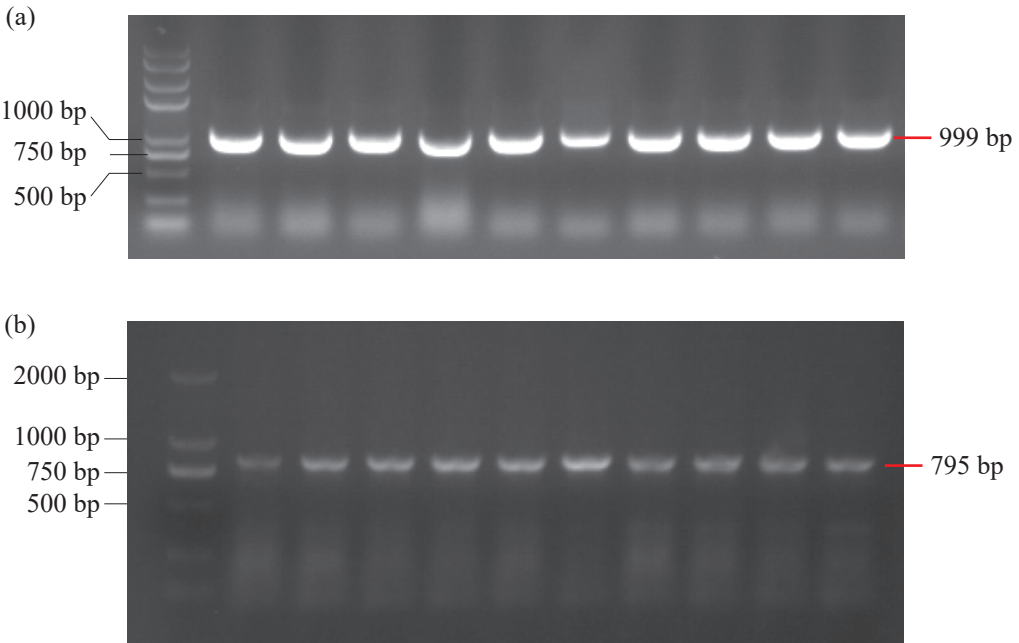

Figure S3. Transgenic positivity check in G418-resistance callus lines with Cas9 specific primers SP-DL/SP-R. (a) Representation of CRISPR/Cas9 system. (b) Representation of PTG/Cas9 system.

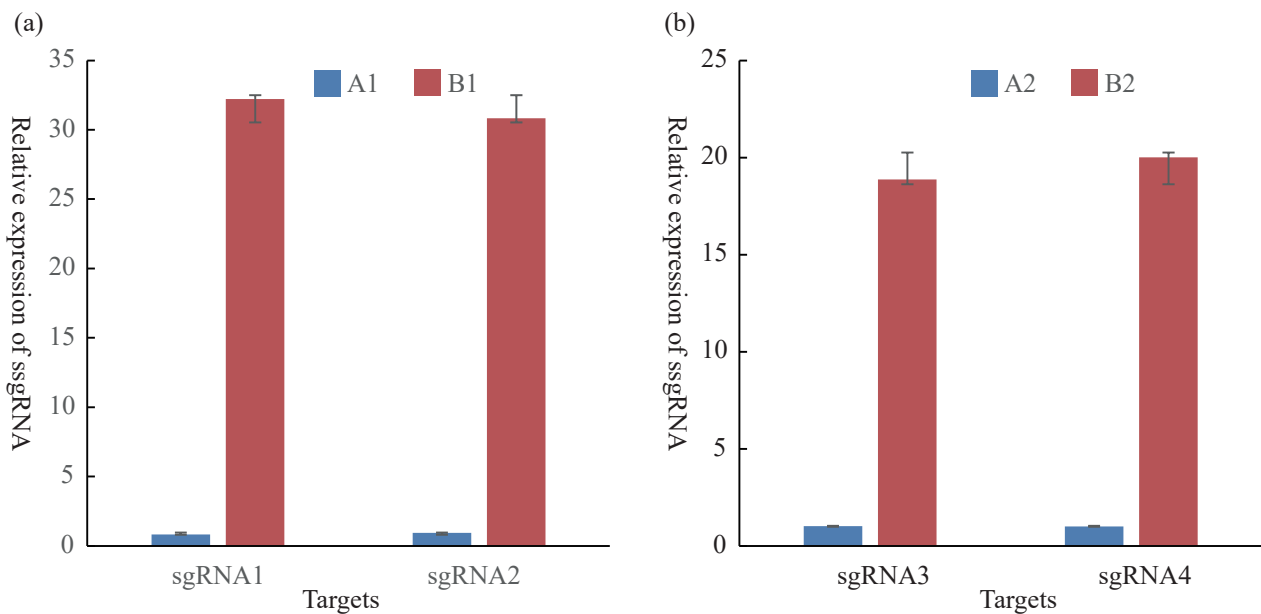

Figure S4. The relative expression of ssgRNAs. (a) The relative expression levels of sgRNA1 and sgRNA2 in kiwifruit G418-resistance callus lines transformed with A1/B1. (b) The relative expression levels sgRNA3 and sgRNA4 in kiwifruit G418-resistance callus lines transformed with A2/B2.
